# Supplementary figures and images for: High-resolution resonance-enhanced multiphoton photoelectron circular dichroism
Source: Royal Society of Chemistry journal article supplement (doi:10.1039/d0cp00470g), 2020-01-01

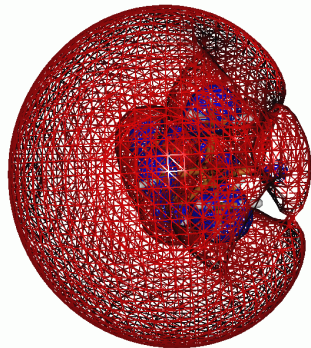

3s

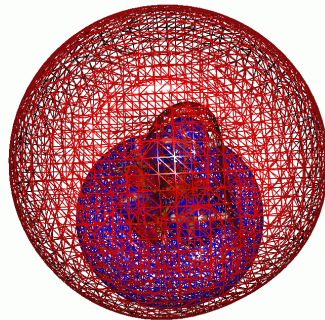

3p<sub>1</sub>

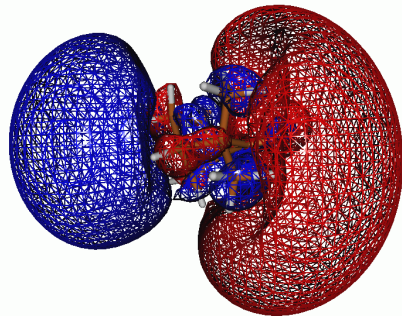

3p<sub>2</sub>

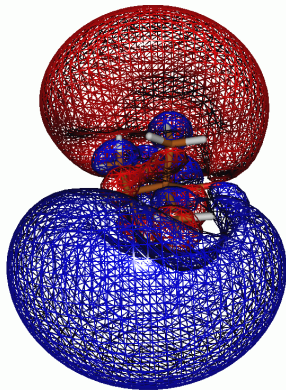

3p<sub>3</sub>

Supplement: d0cp00470g2.pdf [file d0cp00470g2.pdf]

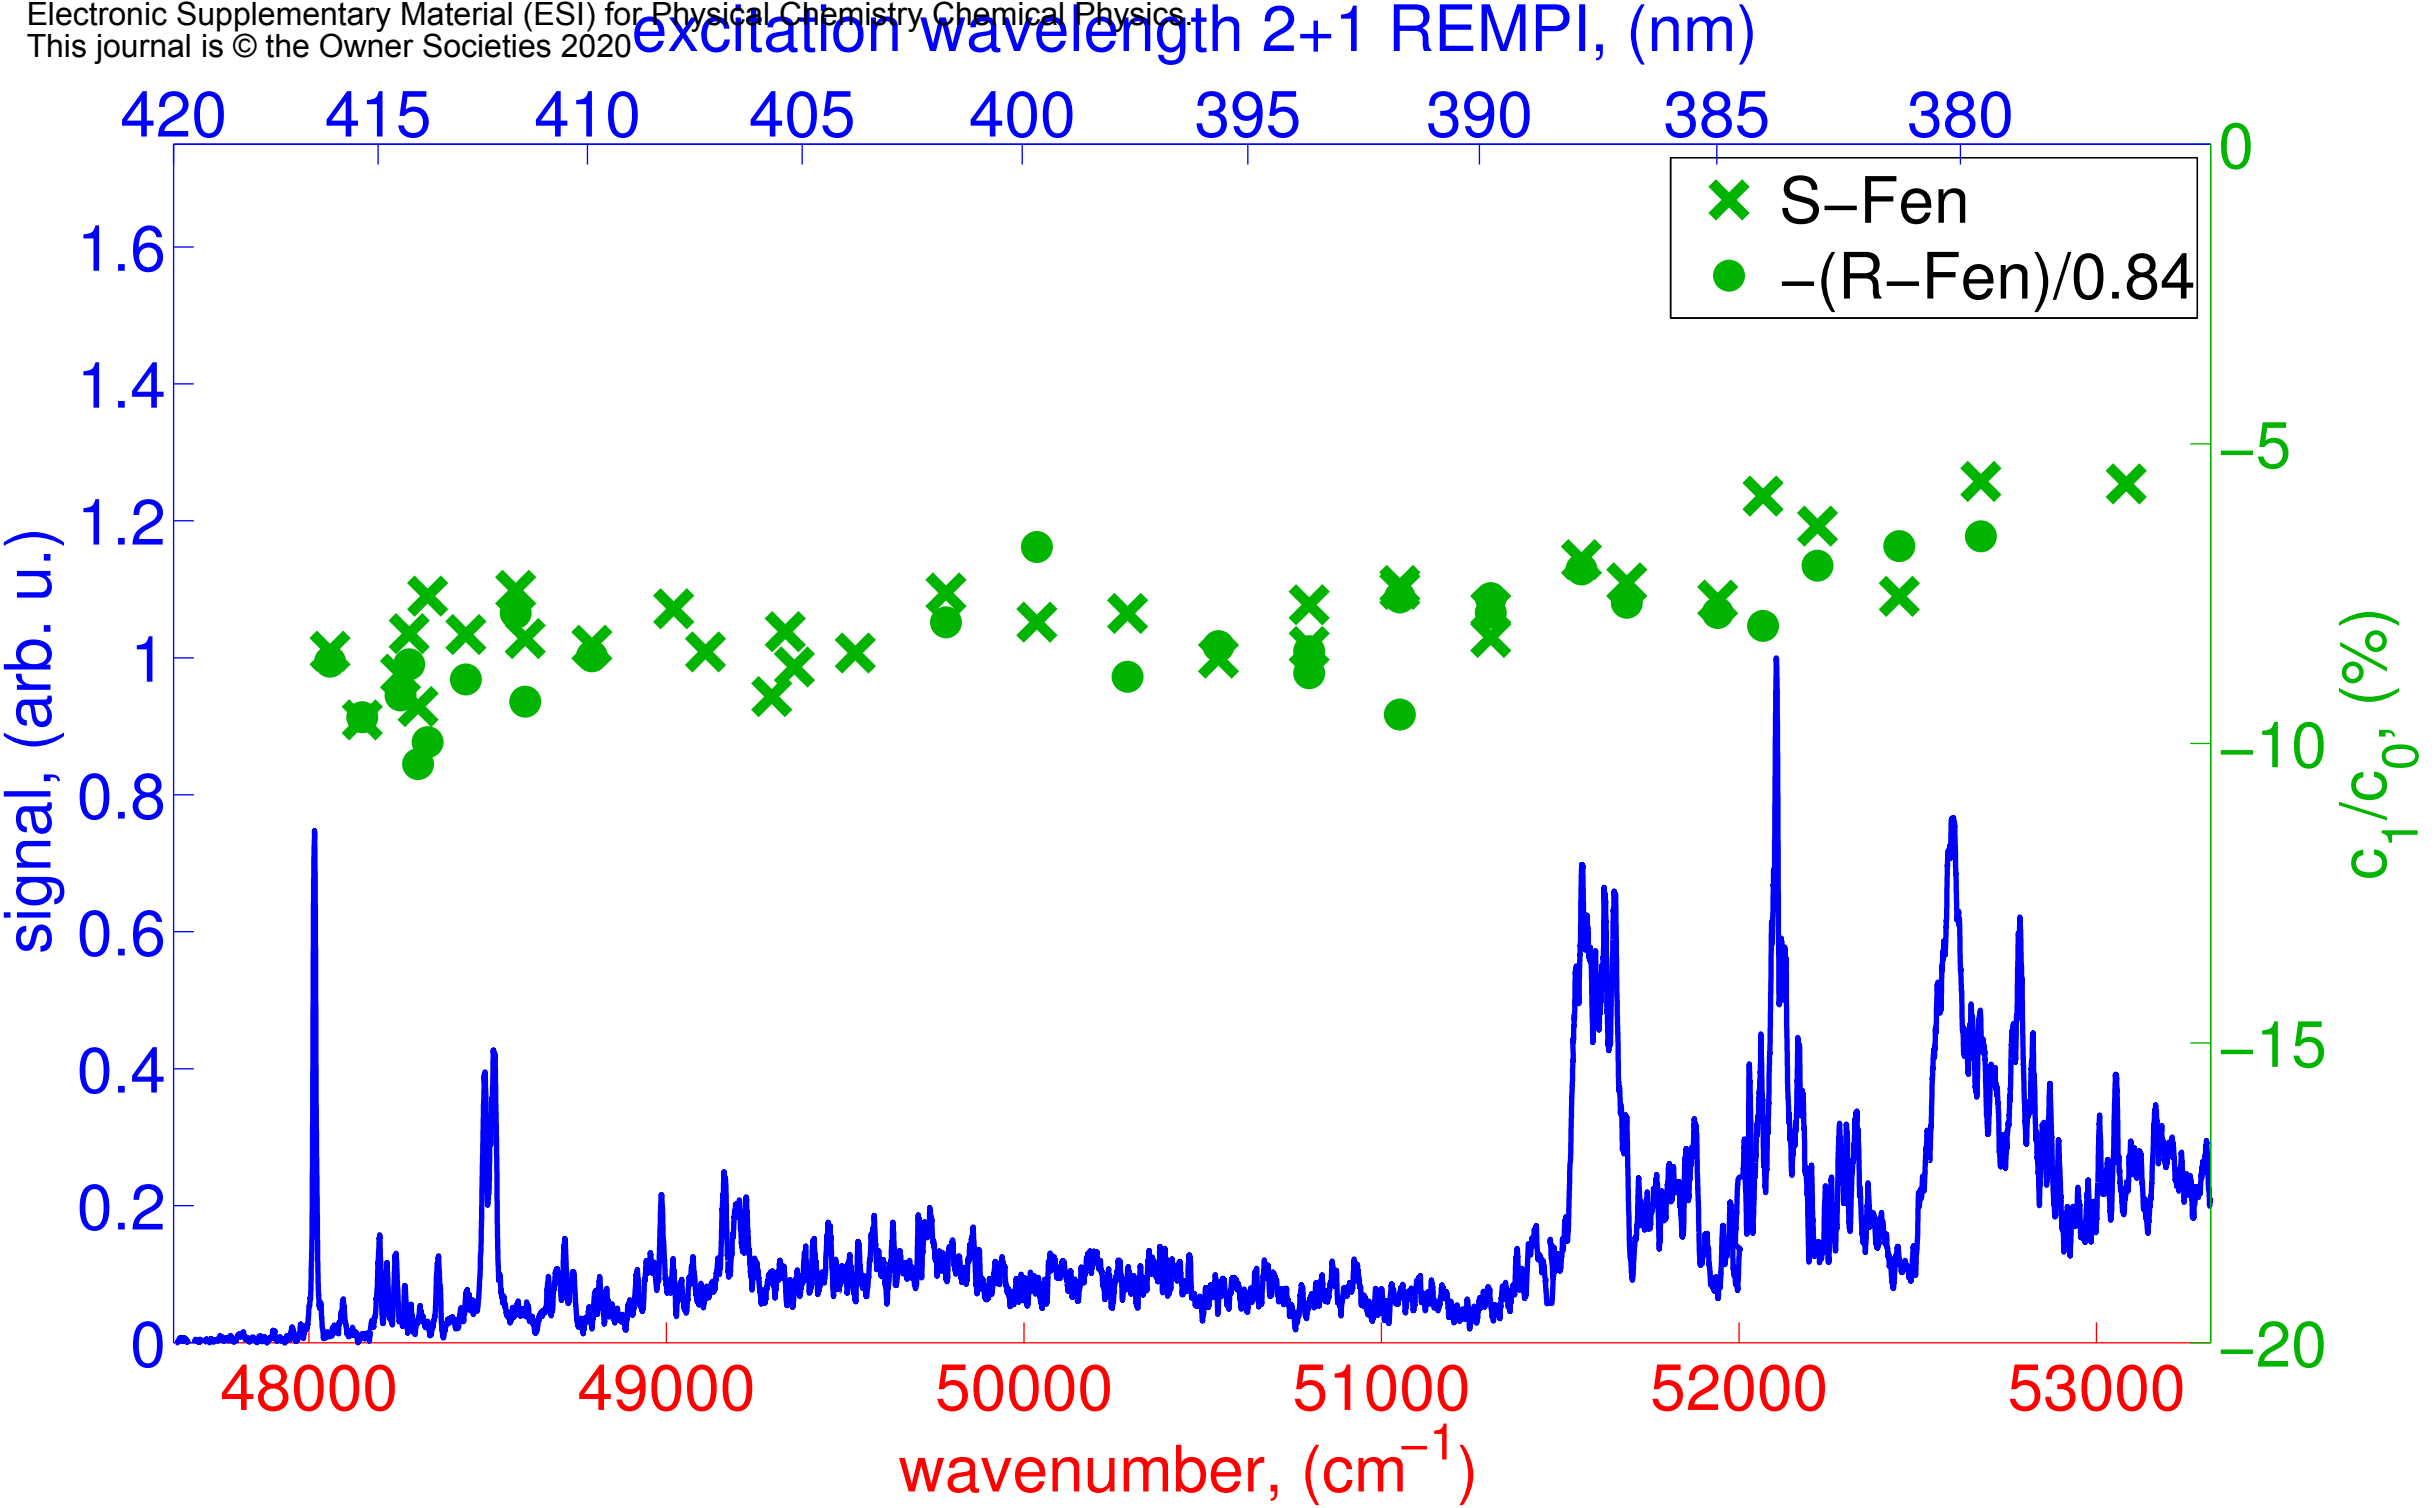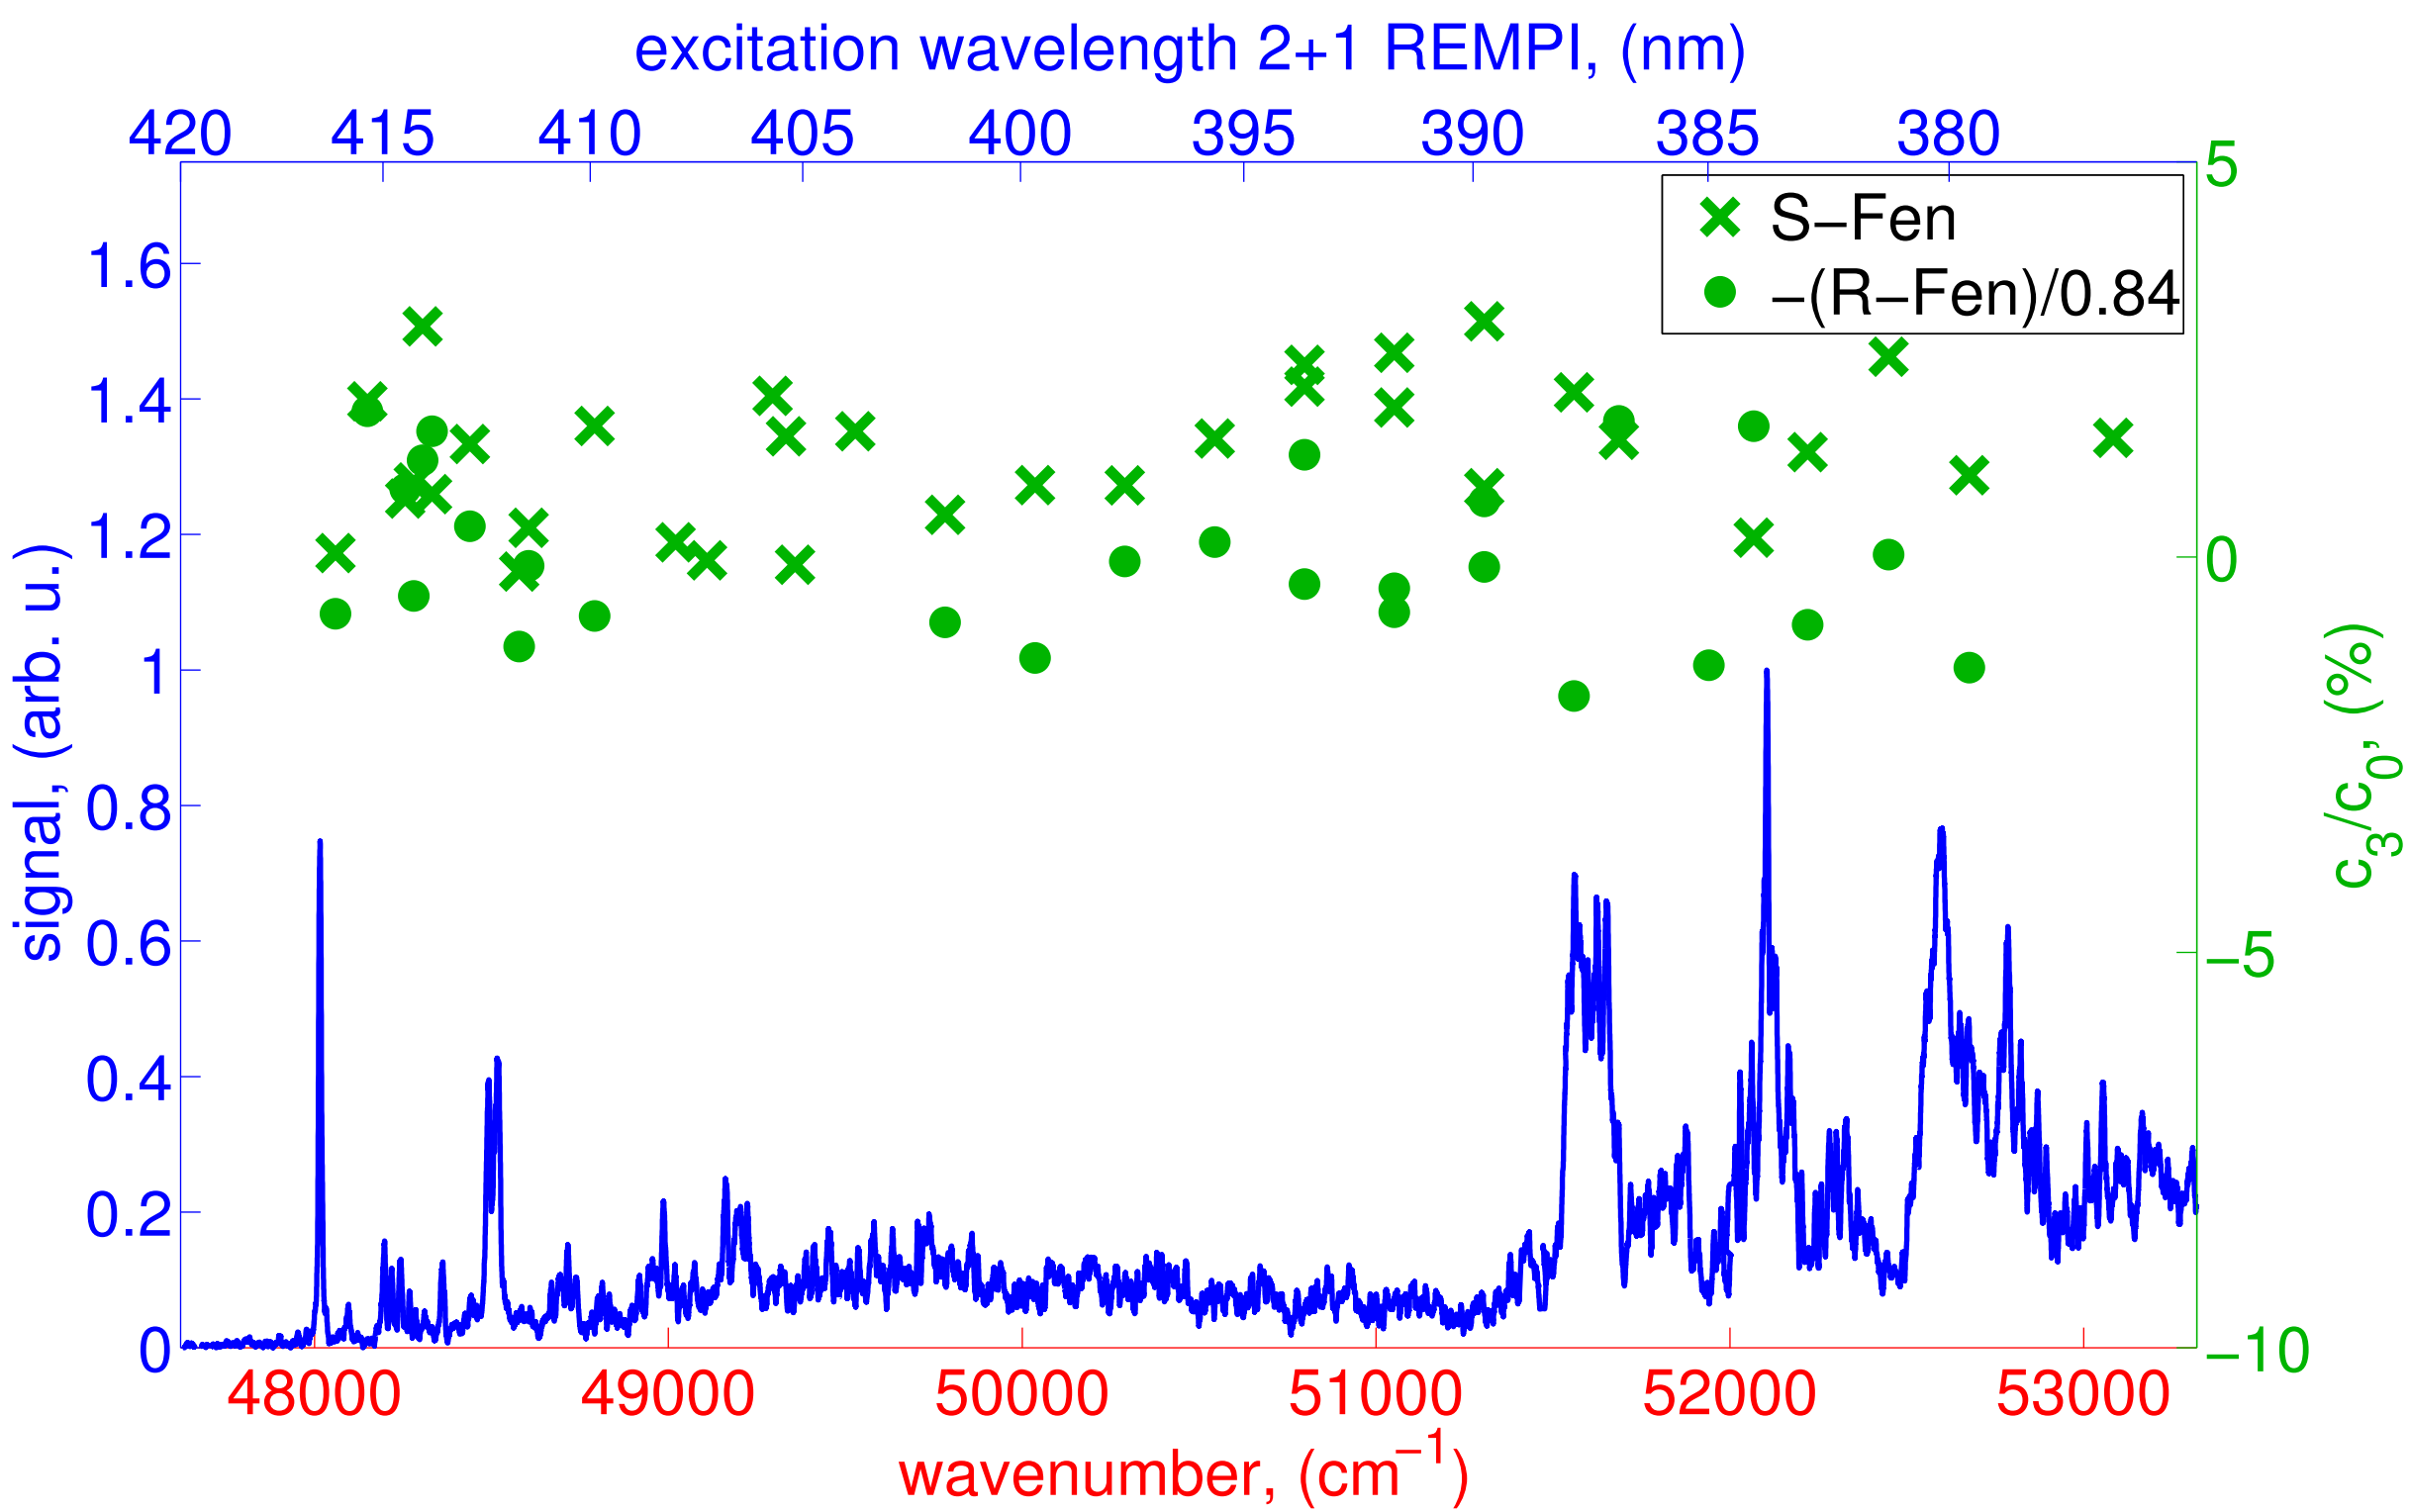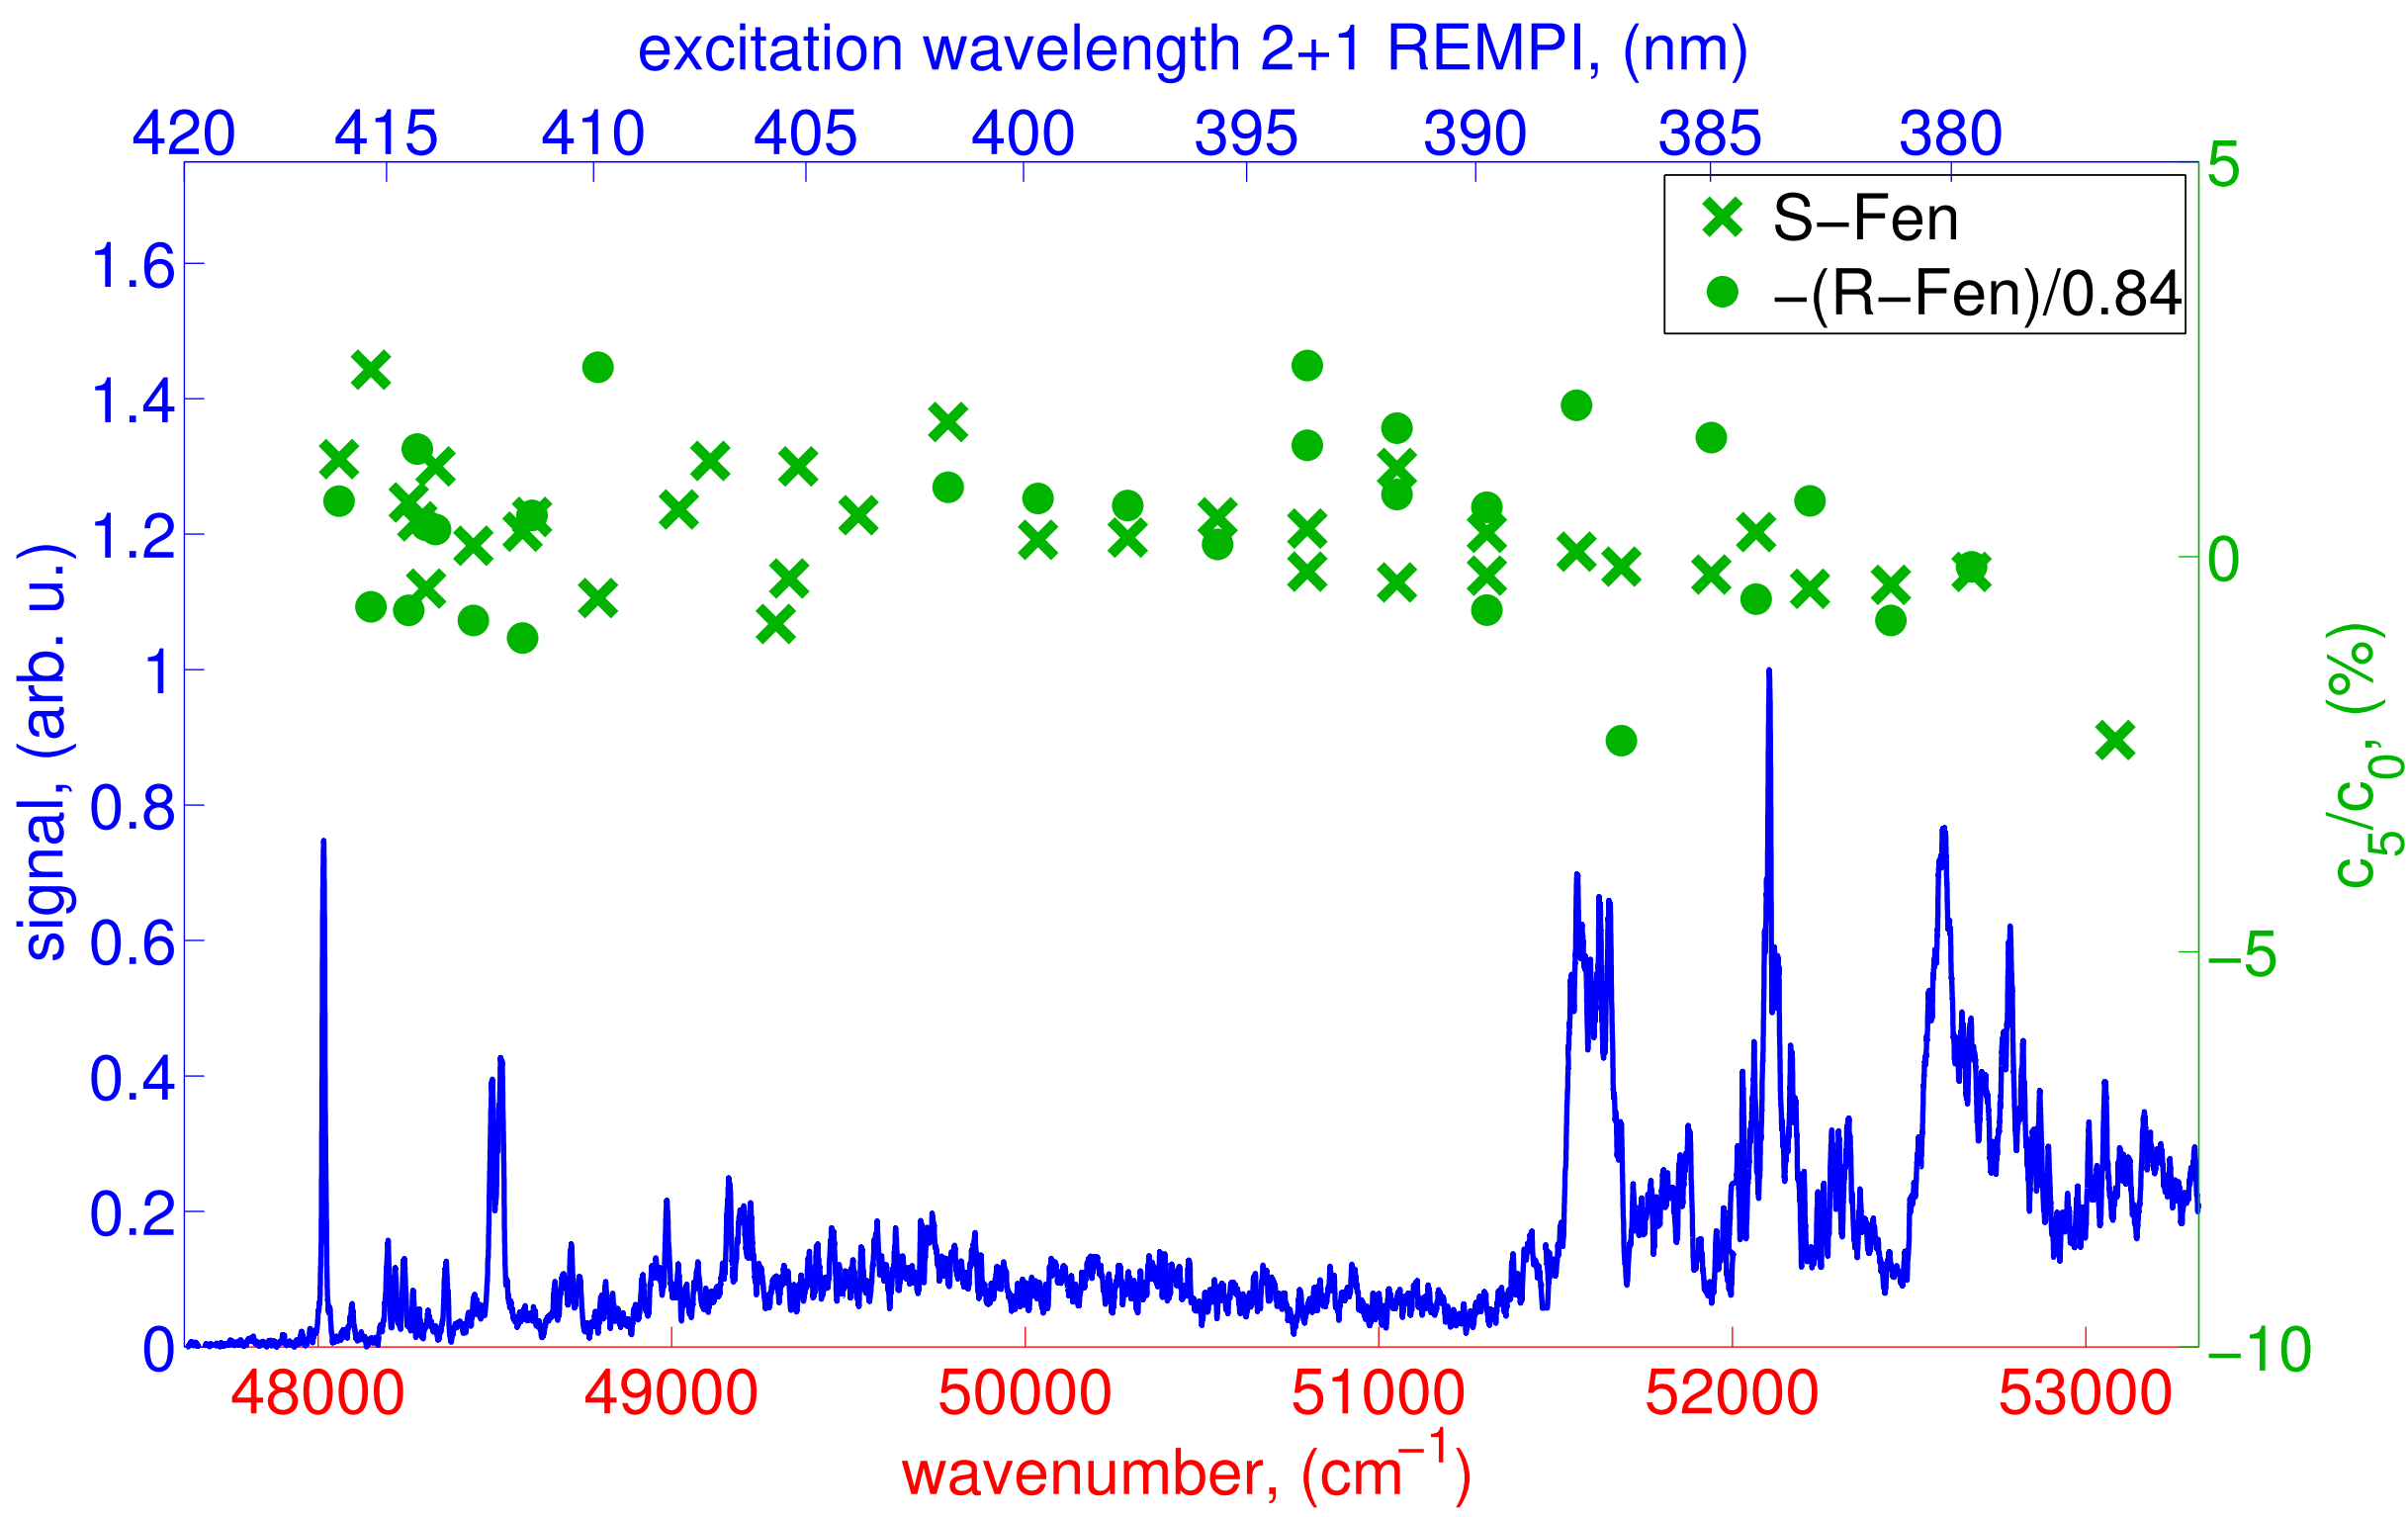

Supplement: d0cp00470g3.pdf [file d0cp00470g3.pdf]
